# Supplementary material
Source: publisher figshare collection journal article supplement (https://gsapubs.figshare.com/ndownloader/files/28889025)
Supplement: Supplementary file 1 [file 28889025]

## Sheet: Table S3
Sullivan, R., Fay, R.P., Schaefer, C., Deino, A., and Edwards, S.W., 2021, Neogene volcanism on the eastside of Mount Diablo, Contra
Costa County California, in Sullivan, R., Sloan, D., Unruh, J.R., and Schwartz, D.P., eds., Regional Geology of Mount Diablo, California: Its Tectonic
Evolution on the North America Plate Boundary: Geological Society of America Memoir 217, https://doi.org/10.1130/2021.1217(11).
Table S3. Sample 343 40Ar/39Ar Analytical data
											Relative Isotopic Abundances										Derived Results																						Inverse Isochron Data
Lab ID#	Sample	Material	Locality	Status Note	Status	Watts	°C	Irrad.	J		40Ar		39Ar		38Ar		37Ar		36Ar		39Ar Mol	39Ar %	36Ar/39Ar	±1s	%(36Ar)Ca	37Ar/39Ar	±1s	Ca/K		38Ar/39Ar	±1s	40Ar/39Ar	±1s	40Ar*/39Ar		%40Ar*	Age (Ma)		w/±J		MSWD	Prob.	36Ar/40Ar		39Ar/40Ar		36Ar/39Ar
									( X 10-3) ± 1s		±1s		±1s		±1s		±1s		±1s		¥ 10-15	of total	( X 10-5)					±1s						±1s			±1s		±1s	±1s			±%1s		±%1s		Er. Corr.
343
27688-01A	343	gm		Incremental release outlier	2	1	0	478A	0.7217	0.0009	4230	60	133.1	1.5	5.4	1.1	18	6	14	0.9	0.00375291	0.019552	10550.7	665.57	0.107531	0.428348	0.130498	0.8	0.2	0	0	31.7431	0.601087	0.276741	2.01174	0.871563	0	3	2.65664	0			0.0033202	6.3883	0.0314938	1.89385	0.18668
27688-01B	343	gm		Incremental release outlier	2	1.3	0	478A	0.7217	0.0009	26300	70	1252	3	34.4	1.9	322	6	75.1	1.1	0.035306	0.183915	5994.05	89.89	0.355866	0.80516	0.0141558	1.58	0.03	0	0	21.0002	0.0752421	3.1695	0.270346	15.0845	4.2	0.4	0.356307	0			0.0028442	1.50609	0.0475926	0.358396	0.122509
27688-01C	343	gm		Incremental release outlier	2	1.69	0	478A	0.7217	0.0009	69420	70	4957	7	109	3	1433	6	179.4	1.4	0.139798	0.728169	3618.47	28.52	0.662961	0.905472	0.004221	1.775	0.008	0	0	13.997	0.0245665	3.2671	0.0852219	23.3272	4.31	0.11	0.112434	0			0.0025681	0.787622	0.0714002	0.175588	0.0783162
27688-01D	343	gm		Incremental release outlier	2	2.2	0	478A	0.7217	0.0009	143020	90	15886	18	267	4	5255	9	280.2	1.8	0.44798	2.33361	1763.21	11.69	1.55791	1.0368	0.0020578	2.033	0.004	0	0	8.99884	0.0113632	3.8191	0.0351281	42.4105	5.04	0.05	0.0467167	0			0.0019289	0.666786	0.111048	0.126348	0.0434457
27688-01E	343	gm		Incremental release outlier	2	2.86	0	478A	0.7217	0.0009	233470	100	36290	30	506	5	12641	12	290.6	1.8	1.02333	5.3309	800.46	5.1	3.6145	1.09202	0.0014224	2.142	0.003	0	0	6.43069	0.0065816	4.13011	0.0158221	64.1787	5.45	0.02	0.0219686	0			0.0011998	0.655235	0.155392	0.102414	0.0295563
27688-01F	343	gm		Incremental release outlier	2	3.72	0	478A	0.7217	0.0009	475321	140	90630	80	1101	6	32140	20	299.8	2	2.5555	13.3133	330.67	2.19	8.911	1.11214	0.0011974	2.181	0.002	0	0	5.24266	0.0047997	4.3465	0.0076881	82.8462	5.732	0.01	0.0124955	0			0.0005745	0.720398	0.190604	0.0916183	0.0129938
27688-01G	343	gm		Incremental release outlier	2	4.84	0	478A	0.7217	0.0009	700124	160	140320	120	1661	10	46490	20	359	2	3.95672	20.6126	256.08	1.52	10.7503	1.03907	0.0010717	2.038	0.002	0	0	4.98741	0.0045192	4.3079	0.0060272	86.3175	5.681	0.008	0.0107565	0			0.0004583	0.659438	0.20037	0.0906772	0.0089535
27688-01H	343	gm		Incremental release outlier	2	6.29	0	478A	0.7217	0.0009	687932	160	142880	130	1705	8	48060	20	329	2	4.02891	20.9887	230.46	1.49	12.132	1.0553	0.0011188	2.069	0.002	0	0	4.81259	0.0045537	4.21084	0.0060103	87.4367	5.553	0.008	0.0106309	0			0.0004208	0.728929	0.207647	0.0946901	0.0080819
27688-01I	343	gm		Incremental release outlier	2	8.18	0	478A	0.7217	0.0009	616972	160	128360	120	1534	10	58120	30	307	2	3.61917	18.8557	238.97	1.65	15.7573	1.42116	0.0014646	2.788	0.003	0	0	4.80477	0.0045933	4.20764	0.0064325	87.4902	5.549	0.008	0.0110476	0			0.000419	0.813097	0.207932	0.0956913	0.0089204
27688-01J	343	gm		Incremental release outlier	2	10.63	0	478A	0.7217	0.0009	511000	200	105660	110	1282	15	67720	50	267	4	2.97911	15.5212	252.93	4.11	21.0788	2.01212	0.0024995	3.949	0.005	0	0	4.83461	0.0053631	4.24432	0.0132438	87.6721	5.597	0.017	0.0188497	0			0.0004129	2.05414	0.206564	0.111065	0.0097387
27688-01K	343	gm		Incremental release outlier	2	13.8	0	478A	0.7217	0.0009	68120	80	14380	17	171	3	11454	11	36	0.8	0.405272	2.11238	250.23	5.82	26.6427	2.51597	0.0038168	4.939	0.008	0	0	4.7356	0.0080168	4.19465	0.0190593	88.4267	5.53	0.02	0.0260751	0			0.0003876	3.17047	0.210808	0.169434	0.0284737
																						100																			69.8786	1.14438e-143
343 - Aliquot #2
27688-02A	343	gm		Incremental release outlier	2	1	0	478A	0.7217	0.0009	15660	70	477	2	19.9	1.4	80	6	50.4	0.8	0.0134426	0.103406	10575.3	173.09	0.132238	0.527944	0.0375138	1.03	0.07	0	0	32.8445	0.215784	1.31283	0.516118	3.99568	1.7	0.7	0.681064	0			0.0032156	1.63082	0.0304356	0.657125	0.189253
27688-02B	343	gm		Incremental release outlier	2	1.3	0	478A	0.7217	0.0009	125160	90	6895	10	184	3	1194	6	372	2	0.19441	1.49472	5393.04	33.53	0.267151	0.543905	0.0031071	1.066	0.006	0	0	18.1438	0.0292139	2.08591	0.0983268	11.4924	2.75	0.13	0.129726	0			0.0029645	0.610624	0.0550951	0.161064	0.0521155
27688-02C	343	gm		Incremental release outlier	2	1.69	0	478A	0.7217	0.0009	191060	100	21680	20	406	5	5706	9	427	2	0.611323	4.69987	1967.33	11.18	1.11338	0.826785	0.0015068	1.621	0.003	0	0	8.80794	0.0096116	3.00116	0.0333894	34.0547	3.96	0.04	0.0442968	0			0.0022088	0.569043	0.113472	0.109175	0.0468966
27688-02D	343	gm		Incremental release outlier	2	2.2	0	478A	0.7217	0.0009	86990	90	14557	18	204	6	4742	10	94.8	1.6	0.410417	3.15572	651.28	11.29	4.16436	1.02368	0.0025147	2.007	0.005	0	0	5.9733	0.0099339	4.11249	0.0346515	68.8018	5.42	0.04	0.046157	0			0.0010449	1.80717	0.1673	0.166382	0.0384922
27688-02E	343	gm		Incremental release outlier	2	2.86	0	478A	0.7217	0.0009	619000	200	118830	100	1430	14	40320	40	357	4	3.35032	25.7604	300.16	3.51	9.41388	1.0665	0.0013953	2.091	0.003	0	0	5.20678	0.0049727	4.39801	0.011338	84.4083	5.8	0.015	0.0166671	0			0.0005222	1.2869	0.191924	0.095568	0.0123713
27688-02F	343	gm		Incremental release outlier	2	3.72	0	478A	0.7217	0.0009	321300	200	66380	70	734	14	19820	30	96	4	1.87129	14.3901	144.67	6.39	17.1951	0.938936	0.0018149	1.841	0.004	0	0	4.83889	0.0062201	4.48391	0.020003	92.6084	5.91	0.03	0.027398	0			0.0002476	5.33508	0.206535	0.128603	0.0088602
27688-02G	343	gm		Incremental release outlier	2	4.84	0	478A	0.7217	0.0009	329700	300	69940	70	800	17	19760	40	104	4	1.97162	15.1619	148.82	5.5	15.8224	0.888804	0.0018602	1.743	0.004	0	0	4.71213	0.0063223	4.34054	0.0175196	92.0622	5.72	0.02	0.0242004	0			0.0002659	4.39343	0.212098	0.134228	0.0120509
27688-02H	343	gm		Incremental release outlier	2	6.29	0	478A	0.7217	0.0009	643800	200	137760	90	1619	18	44200	40	251	4	3.88385	29.8641	182.28	2.94	14.6694	1.00928	0.0011431	1.979	0.002	0	0	4.6715	0.003702	4.20981	0.0094504	90.0585	5.552	0.012	0.0143255	0			0.000333	1.88937	0.213925	0.0792911	0.0107387
27688-02I	343	gm		Incremental release outlier	2	8.18	0	478A	0.7217	0.0009	120040	100	24770	20	292	5	11951	15	56.7	1.7	0.69834	5.36974	228.83	6.72	17.577	1.51799	0.002338	2.978	0.004	0	0	4.8438	0.0061736	4.28497	0.0209368	88.3742	5.65	0.03	0.0284991	0			0.0003894	3.56476	0.206242	0.127531	0.0169169
																						100																			319.006	0
343 - Aliquot #3
27688-03A	343	gm		Incremental release outlier	2	1	0	478A	0.7217	0.0009	115080	90	3306	5	116	2	648	6	354.1	2	0.0931792	0.64602	10707.6	61.99	0.152956	0.618261	0.0059877	1.212	0.012	0	0	34.7996	0.0585377	2.88078	0.180896	8.27469	3.8	0.2	0.238487	0			0.0030723	0.565329	0.0287238	0.168273	0.0621185
27688-03B	343	gm		Incremental release outlier	2	1.3	0	478A	0.7217	0.0009	75640	100	3838	8	114	3	743	7	208	2	0.108186	0.749977	5427.83	58.85	0.297648	0.609879	0.0059629	1.195	0.012	0	0	19.699	0.0491089	3.54318	0.174257	17.9792	4.7	0.2	0.229655	0			0.0027472	1.07341	0.0507431	0.249378	0.0598297
27688-03C	343	gm		Incremental release outlier	2	1.69	0	478A	0.7217	0.0009	89390	100	8965	12	178	5	2452	9	191	2	0.252691	1.75184	2129.39	23.11	1.0728	0.862261	0.003303	1.691	0.006	0	0	9.9669	0.0173753	3.67956	0.0694918	36.8966	4.85	0.09	0.0917539	0			0.0021136	1.09337	0.100275	0.1744	0.0603268
27688-03D	343	gm		Incremental release outlier	2	2.2	0	478A	0.7217	0.0009	128600	110	19380	19	275	5	6179	11	158	2	0.546272	3.78701	813.22	10.96	3.2755	1.0054	0.0020407	1.972	0.004	0	0	6.633	0.0085821	4.28732	0.0334129	64.5935	5.65	0.04	0.0445862	0			0.0011859	1.39258	0.150662	0.129443	0.0390157
27688-03E	343	gm		Incremental release outlier	2	2.86	0	478A	0.7217	0.0009	785200	300	147180	110	1757	12	47660	40	544	5	4.14846	28.7602	369.2	3.26	7.33149	1.02164	0.0011886	2.003	0.002	0	0	5.33292	0.0046033	4.31427	0.0104952	80.8452	5.69	0.014	0.0156157	0			0.0006416	0.951274	0.18739	0.0863714	0.0173049
27688-03F	343	gm		Incremental release outlier	2	3.72	0	478A	0.7217	0.0009	358100	200	74050	80	805	17	21830	40	130	4	2.08725	14.47	175.23	5.83	14.0656	0.930298	0.0019383	1.824	0.004	0	0	4.83383	0.0060829	4.38684	0.0183372	90.6988	5.78	0.02	0.0252505	0			0.0003115	3.8728	0.206752	0.125904	0.0095591
27688-03G	343	gm		Incremental release outlier	2	4.84	0	478A	0.7217	0.0009	345900	200	73340	80	854	18	21280	40	98	4	2.06726	14.3312	133.65	5.14	18.1536	0.915807	0.0019077	1.796	0.004	0	0	4.71378	0.006403	4.38973	0.0165411	93.0711	5.79	0.02	0.0230014	0			0.0002321	4.70147	0.21202	0.135904	0.0087146
27688-03H	343	gm		Incremental release outlier	2	6.29	0	478A	0.7217	0.0009	707000	300	152080	140	1826	20	51740	40	270	4	4.28632	29.7177	177.36	2.33	16.0419	1.07391	0.0012981	2.106	0.002	0	0	4.64673	0.0045163	4.20503	0.0081306	90.4317	5.546	0.011	0.0128402	0			0.0003205	1.56267	0.215056	0.0972603	0.0093956
27688-03I	343	gm		Incremental release outlier	2	8.18	0	478A	0.7217	0.0009	146090	140	29610	30	349	4	17876	18	80.5	1.8	0.834479	5.78604	271.84	6.03	18.5841	1.90663	0.0029705	3.742	0.006	0	0	4.93198	0.0075898	4.27661	0.0193644	86.6013	5.64	0.02	0.0264977	0			0.0004488	2.72208	0.2025	0.154016	0.0237279
																						100																			46.8486	4.60032e-76
Table S3	Sullivan	EsideVolcanics
